# Supplementary material
Source: Elsevier journal article supplement (https://www.sciencedirect.com/science/article/pii/S0213911122000024)
Supplement: mmc2 [file S0213911122000024:mmc2.doc]

| **Tema** | **Preguntas** |
| --- | --- |
| Pregunta introductoria | ¿Cómo ha sido esta primera experiencia de maternidad y paternidad? |
| Efectos en salud desde una perspectiva biopsicosocial | Con respecto a tu salud, entendiéndola como un completo bienestar tanto físico como mental y también social:  ¿Cómo te has sentido física y emocionalmente?  ¿Cómo han sido tus relaciones con tu entorno social después de ser madre o padre? (pareja, familia, amigos)  ¿Cómo te has sentido en tu trabajo productivo? |
| Distribución de tareas de cuidado y domésticas | ¿Cómo se organizan con tu pareja con las tareas de cuidado y domésticas?  ¿Qué tipo de apoyo recibes? ¿De parte de quien?  ¿Qué tipo de estrategias has tenido que poner en práctica para organizarse? |
| Respuesta de la atención sanitaria | ¿Cómo valorarías la respuesta de la atención sanitaria en esta nueva vivencia? |

**Apéndice**

**Guion de la entrevista**
